# Supplementary material for: Effects of sub-lithospheric small-scale convection with a Newtonian rheology on the seafloor topography and heat flux
Source: MDPI journal article supplement (doi:10.3390/nano11081998), 2004-01-01

# Supporting Information

## Topological phase and quantum anomalous Hall effect in ferromagnetic transition-metal dichalcogenides monolayer

### 1T-VSe<sub>2</sub>

Angus Huang,<sup>1,2</sup> Chin-Hsuan Chen,<sup>1</sup> Ching-Hao Chang,<sup>2</sup> and Horng-Tay Jeng<sup>1,3,4</sup>

1. Department of Physics, National Tsing Hua University, Hsinchu 30013, Taiwan

2. Department of Physics, National Cheng Kung University, Tainan 70101, Taiwan

3. Physics Division, National Center for Theoretical Sciences, Hsinchu 30013, Taiwan

4. Institute of Physics, Academia Sinica, Taipei 11529, Taiwan

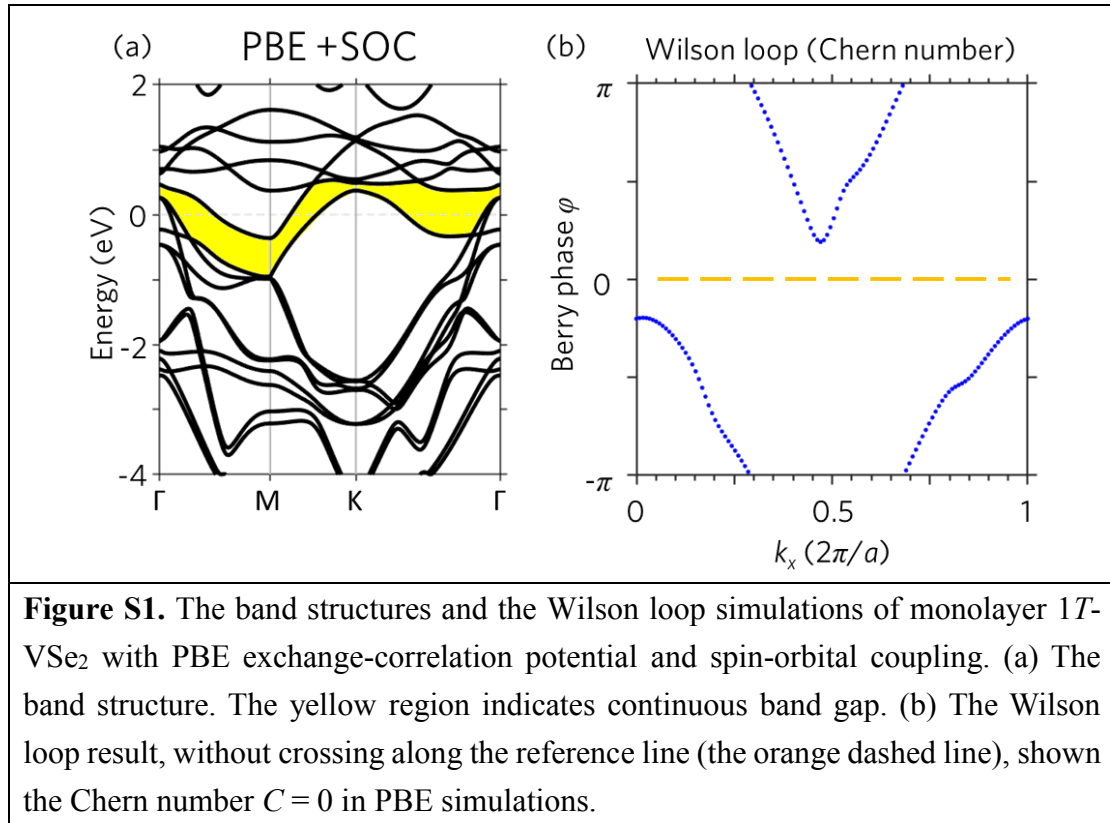

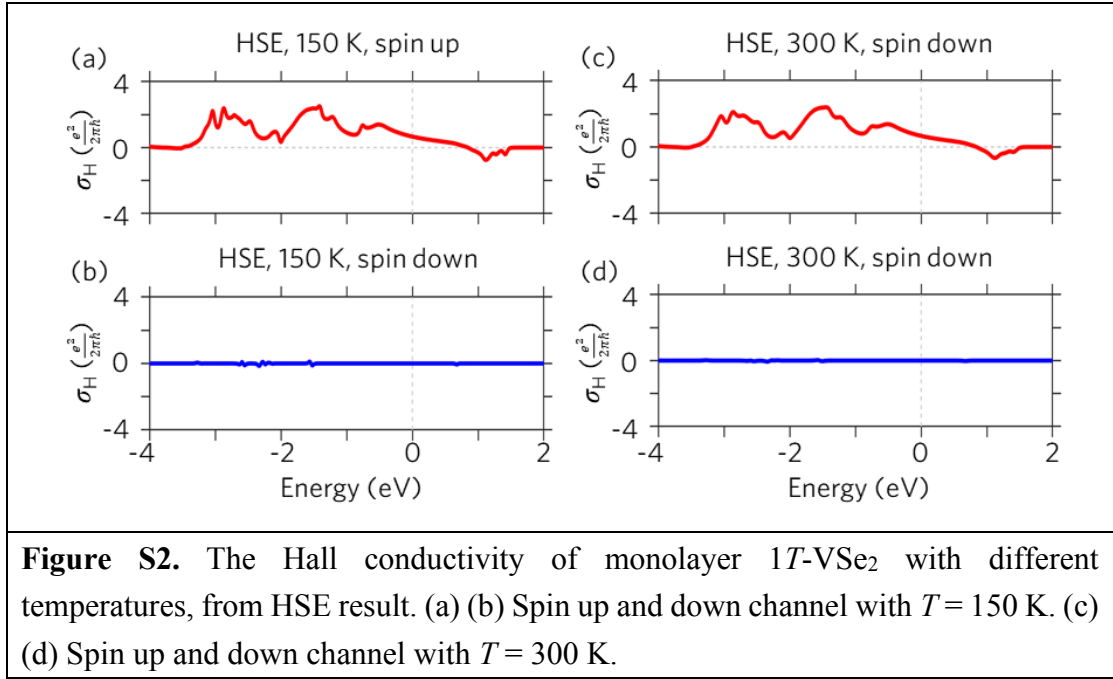

Supplement: s1 [file s1]
